# Supplementary material for: Biofilm Formation and Virulence of Shigella flexneri is Modulated by pH of Gastrointestinal Tract
Source: bioRxiv or medRxiv preprint supplement (doi:10.1101/2020.10.16.336651), 2020-10-16
Supplement: Supplementary file [file media-1.pdf]

| <b>Gene name</b> |                | <b>Primers 5' -&gt; 3'</b> |
|------------------|----------------|----------------------------|
| ansB             | Forward Primer | TACCATTACCCACACCAGCG       |
|                  | Reverse Primer | AGCGATACGCCATTTCGATGT      |
| asnA             | Forward Primer | GCATATCGGCCAGGTTTCAGT      |
|                  | Reverse Primer | TTACAGCAGAGAAGGGACGC       |
| napA             | Forward Primer | CTTTCACCTTTGTCGCCACGG      |
|                  | Reverse Primer | AGTACGACCTGTGGCTCTCT       |
| ccmF             | Forward Primer | CCCATAGCGGATACACGGAC       |
|                  | Reverse Primer | CTGTGCTTGGCGTTAGGGAT       |
| ccmE             | Forward Primer | GCTTTCTCAACTTCTGGCGG       |
|                  | Reverse Primer | GCGAGCTGGAAAAAGGCAAT       |
| cysW             | Forward Primer | ACGGTGTGTAGTCCTGCTC        |
|                  | Reverse Primer | ACTTTCGCTGCCGTTACAGA       |
| cysB             | Forward Primer | GCGTATCGTTTTTCACGGCAA      |
|                  | Reverse Primer | CATGCTGGCAATGACCCCTA       |
| cysJ             | Forward Primer | ACTTCGCCCTCTTCTTCCAC       |
|                  | Reverse Primer | ACCCCGCGTCTCTATTCCAT       |
| argD             | Forward Primer | CGGCATTCAGCACCATTACG       |
|                  | Reverse Primer | TAATTGGCGCGGAGCTGAAA       |
| argA             | Forward Primer | AGTCTCAATAACACGCCGCT       |
|                  | Reverse Primer | ATTGCACCGCTTTCAGTTG        |
| argC             | Forward Primer | TGACTGTTTCAGCGCAAAGC       |
|                  | Reverse Primer | GGCGAGAAACACTACGTCCA       |
| recA             | Forward Primer | CAGGCAGTTGCATTCGCTTT       |
|                  | Reverse Primer | TCTACGGCGAACTGGTTGAC       |
